# Supplementary material for: Artificial light-harvesting systems (LHSs) based on boron-difluoride (BF2) hydrazone complexes (BODIHYs)
Source: Royal Society of Chemistry journal article supplement (doi:10.1039/d0nj04547k), 2020-12-18
Supplement: d0nj04547k1.pdf [file d0nj04547k1.pdf]

**Artificial Light-harvesting Systems (LHSs) Based on Boron-difluoride (BF<sub>2</sub>) Hydrazone Complexes (BODIHYs)**

Vishwa Deepak Singh, Bhupendra Kumar Dwivedi, Yogesh Kumar and Daya Shankar Pandey\*

Department of Chemistry, Institute of Science, Banaras Hindu University, Varanasi – 221 005 (U. P.) India

| <b>Contents:</b>                                                                                 | <b>Page</b>  |
|--------------------------------------------------------------------------------------------------|--------------|
| 1. $^1\text{H}$ and $^{13}\text{C}$ NMR spectra of <b>L1</b>                                     | <b>S3</b>    |
| 2. $^1\text{H}$ and $^{13}\text{C}$ NMR spectra of <b>L2</b>                                     | <b>S4</b>    |
| 3. $^1\text{H}$ , $^{13}\text{C}$ , $^{11}\text{B}$ and $^{19}\text{F}$ NMR spectra of <b>B1</b> | <b>S5-S6</b> |
| 4. $^1\text{H}$ , $^{13}\text{C}$ , $^{11}\text{B}$ and $^{19}\text{F}$ NMR spectra of <b>B1</b> | <b>S7-S8</b> |
| 5. ESI-MS of Ligands and complexes                                                               | <b>S9</b>    |
| 6. Absorption and Emission of Ligands                                                            | <b>S10</b>   |
| 7. Emission spectra of <b>L1–L2</b> in solvents of varying polarities                            | <b>S10</b>   |
| 8. Emission spectra of <b>B1–B2</b> in solvents of varying polarities                            | <b>S10</b>   |
| 9. Absorption spectra of <b>L1–L2</b> in THF/water                                               | <b>S11</b>   |
| 10. Emission spectra of <b>L1–L2</b> in THF/water                                                | <b>S11</b>   |
| 11. Absorption spectra of <b>B1–B2</b> in THF/water                                              | <b>S11</b>   |
| 12. SEM images of aggregates                                                                     | <b>S12</b>   |
| 13. Absorption spectra of <b>B1–B2</b> in $\text{CH}_3\text{OH}$ /glycerol                       | <b>S12</b>   |
| 14. Plot of average fluorescence lifetimes and fluorescence contrast ( $I/I_0$ ) vs. viscosity   | <b>S13</b>   |
| 15. Plot between radiative ( $k_r$ ) and non-radiative ( $k_{nr}$ ) rate constants vs. viscosity | <b>S13</b>   |
| 16. Fluorescence spectra of <b>B1</b> with RhB                                                   | <b>S14</b>   |
| 17. UV-vis spectra of <b>B1</b> and <b>B2</b> obtained from TD-DFT calculations                  | <b>S14</b>   |
| 18. Table                                                                                        | <b>S15</b>   |

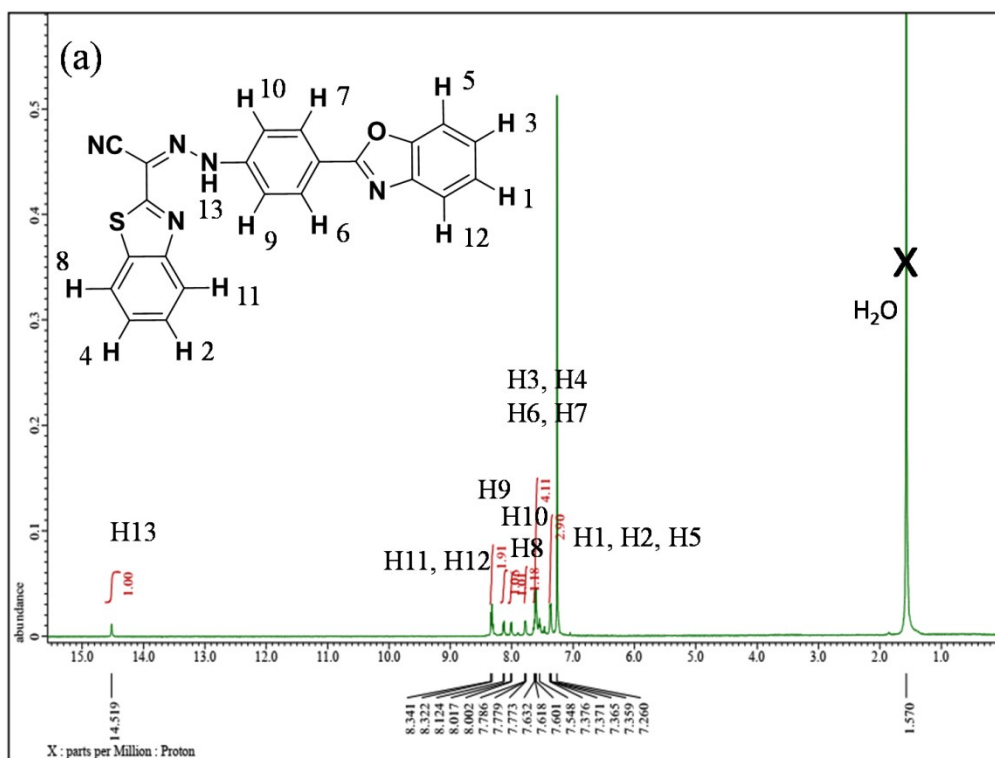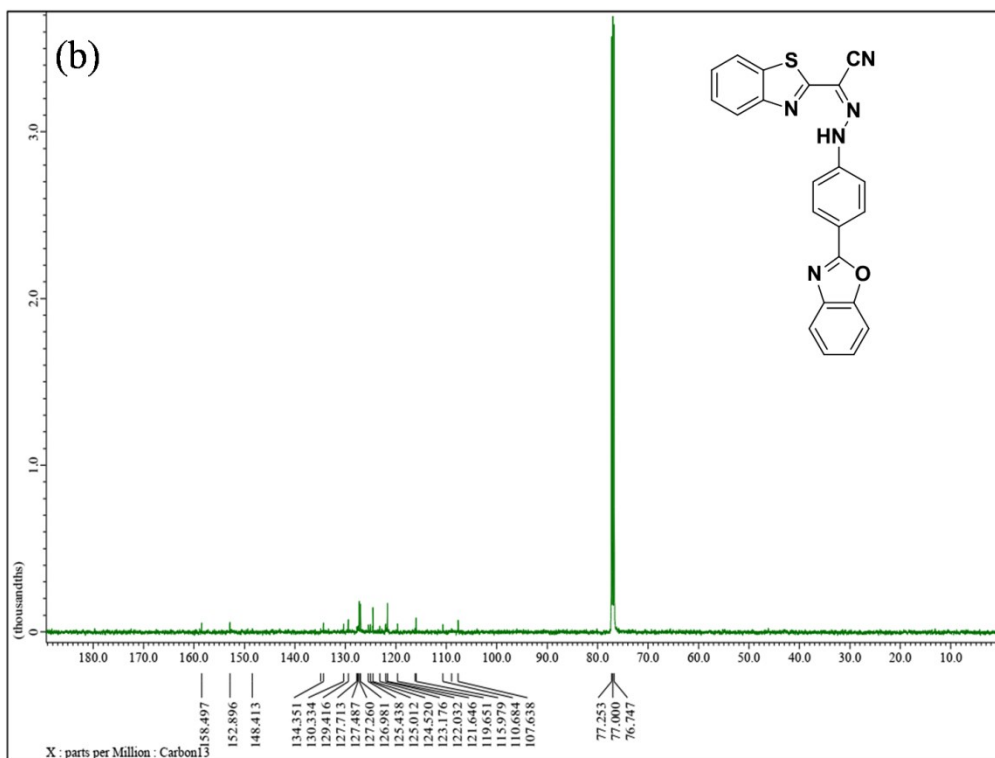

Fig. S1.  $^1\text{H}$  (a) and  $^{13}\text{C}$  (b) NMR spectra of L1.

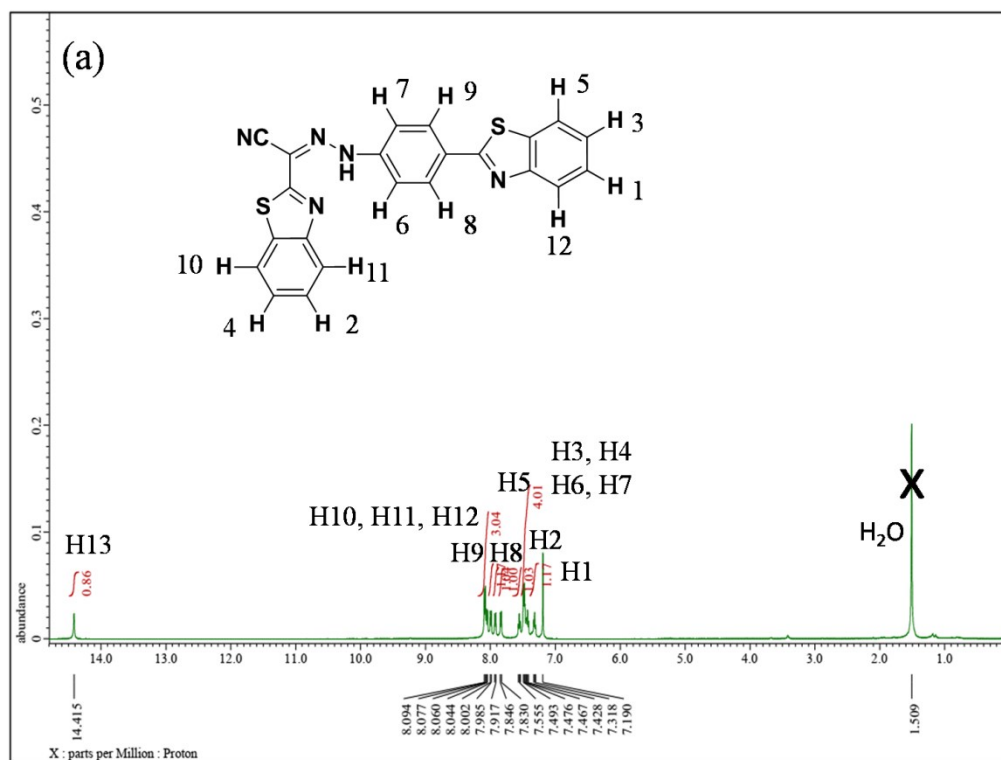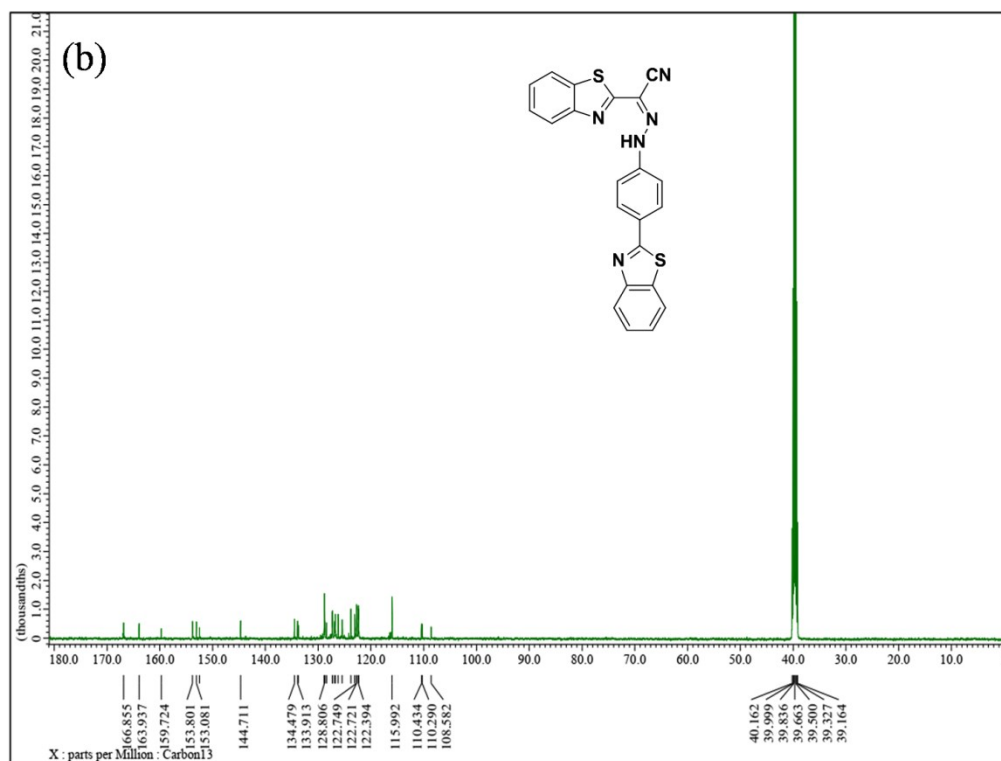

Fig. S2.  $^1\text{H}$  (a) and  $^{13}\text{C}$  (b) NMR spectra of L2.

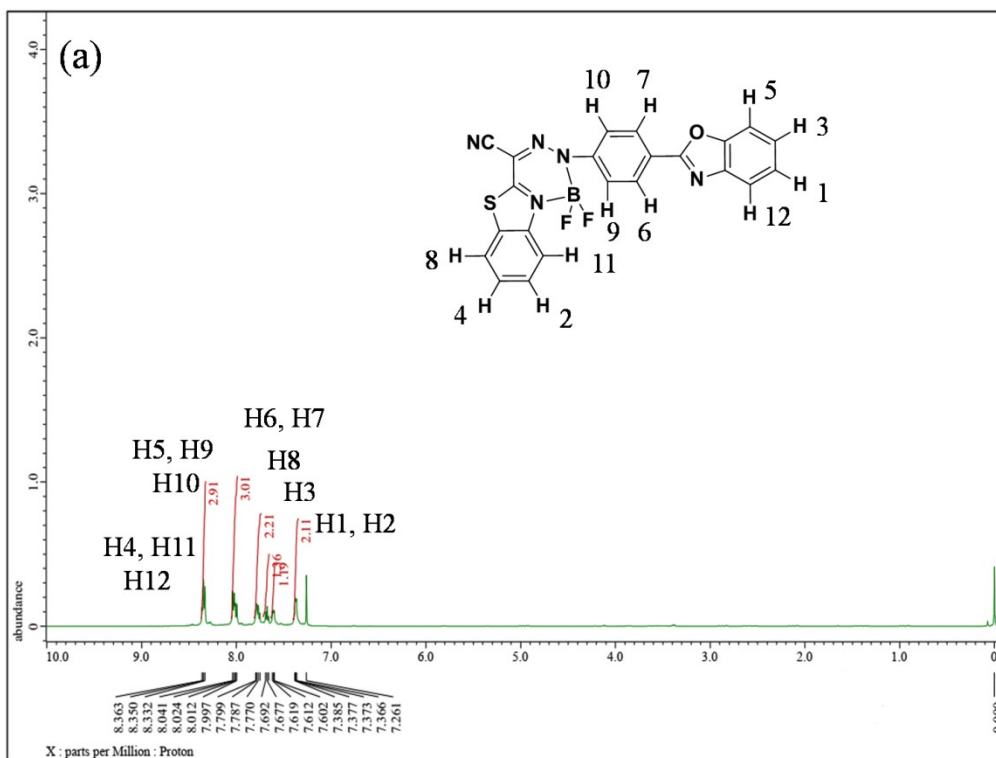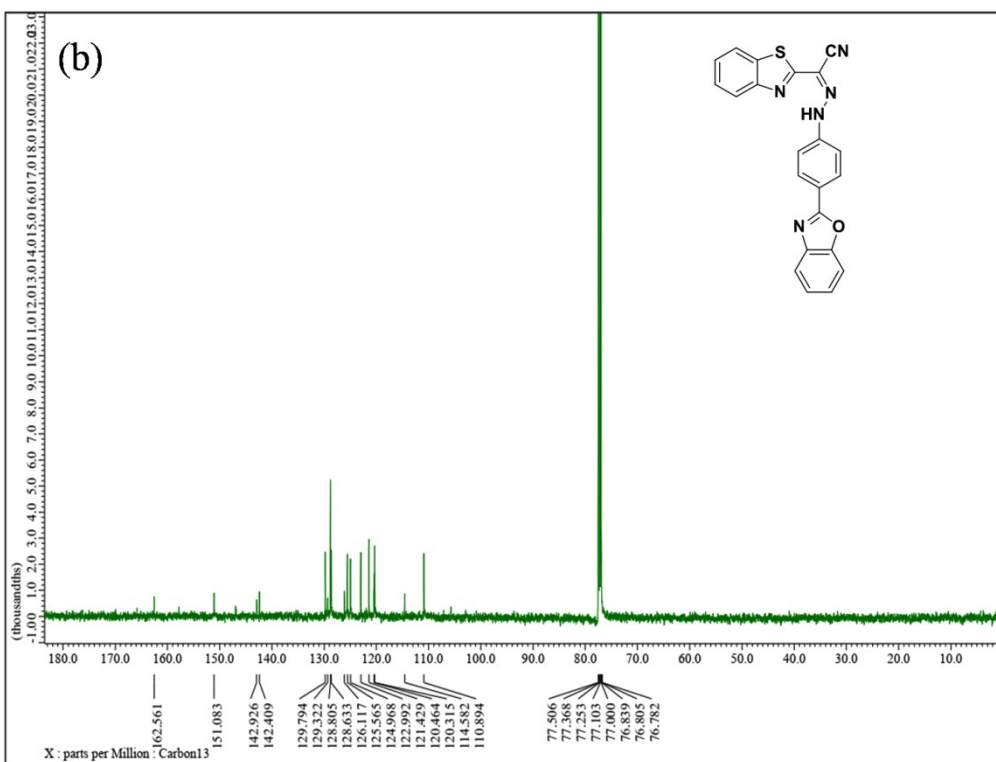

Fig. S3.  $^1\text{H}$  (a) and  $^{13}\text{C}$  (b) NMR spectra of B1.

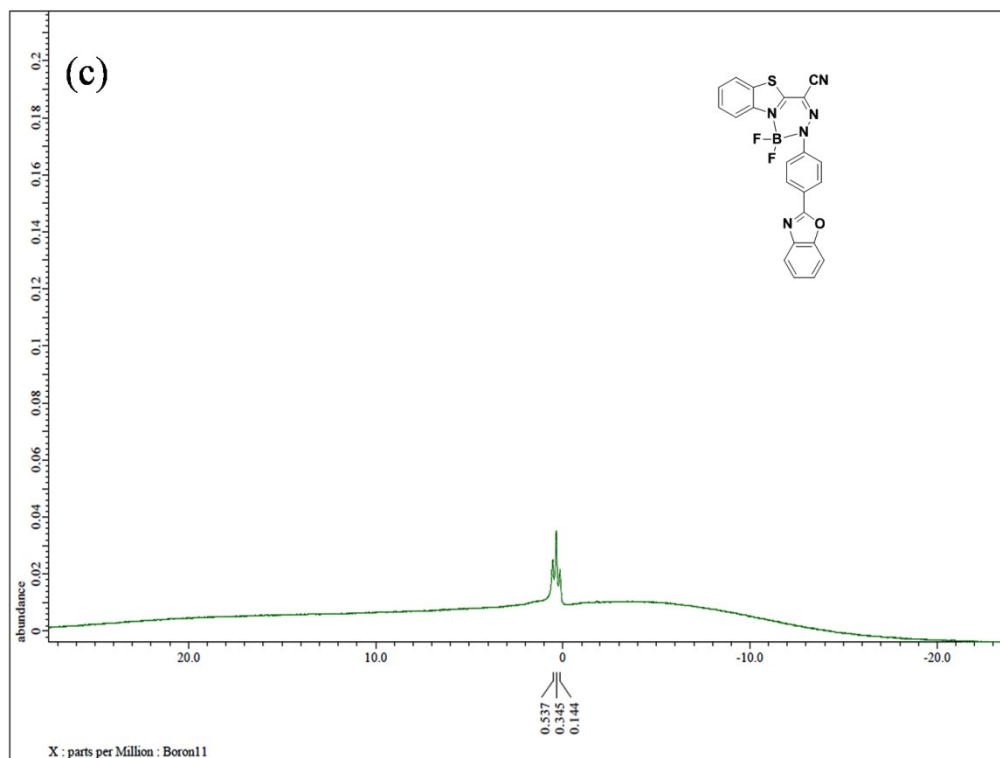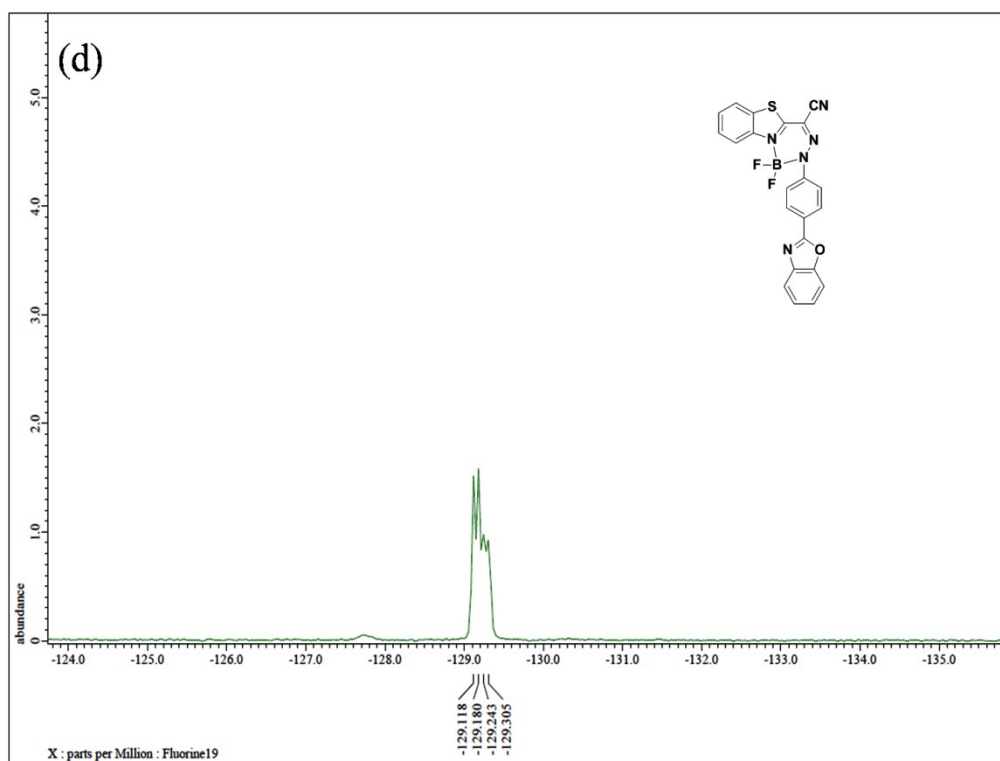

**Fig. S4.**  $^{11}\text{B}$  (c) and  $^{19}\text{F}$  (d) NMR spectra of **B1**.

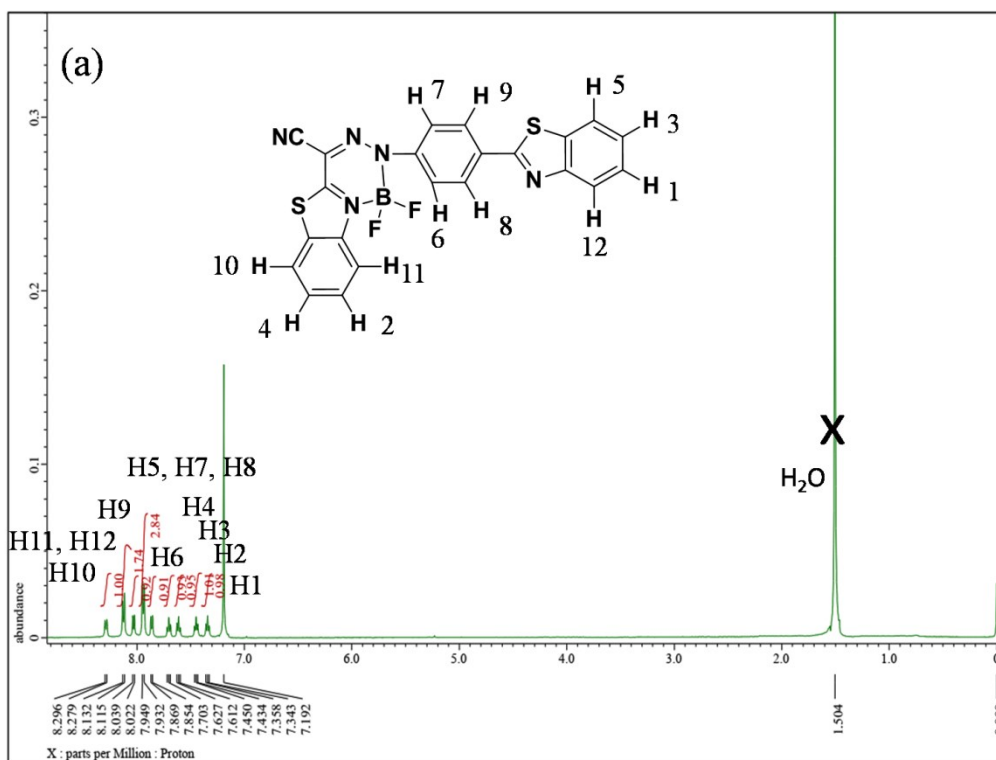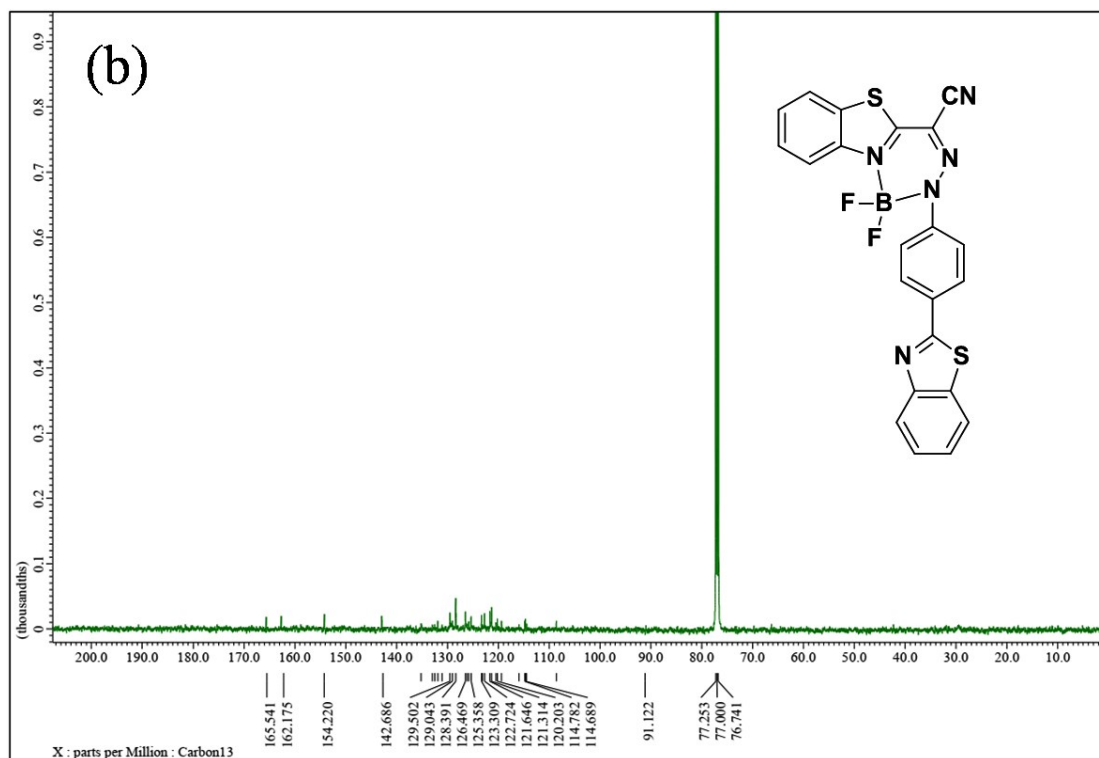

Fig. S5.  $^1\text{H}$  (a) and  $^{13}\text{C}$  (b) NMR spectra of **B2**.

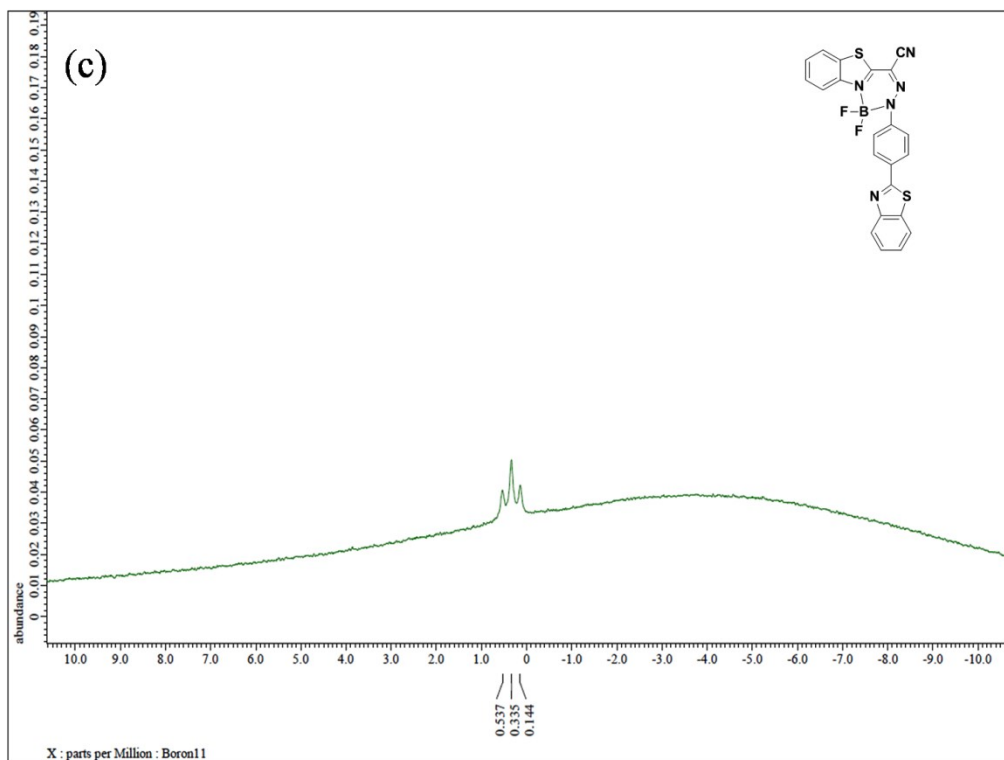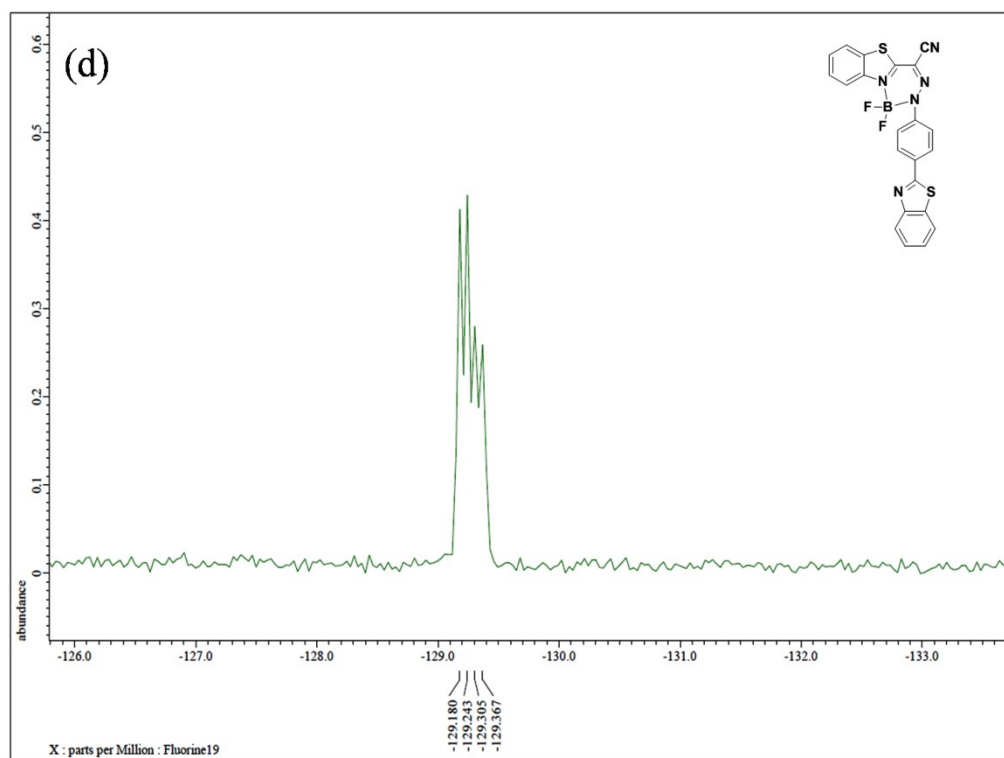

**Fig. S6.**  $^{11}\text{B}$  (c) and  $^{19}\text{F}$  (d) NMR spectra of **B2**.



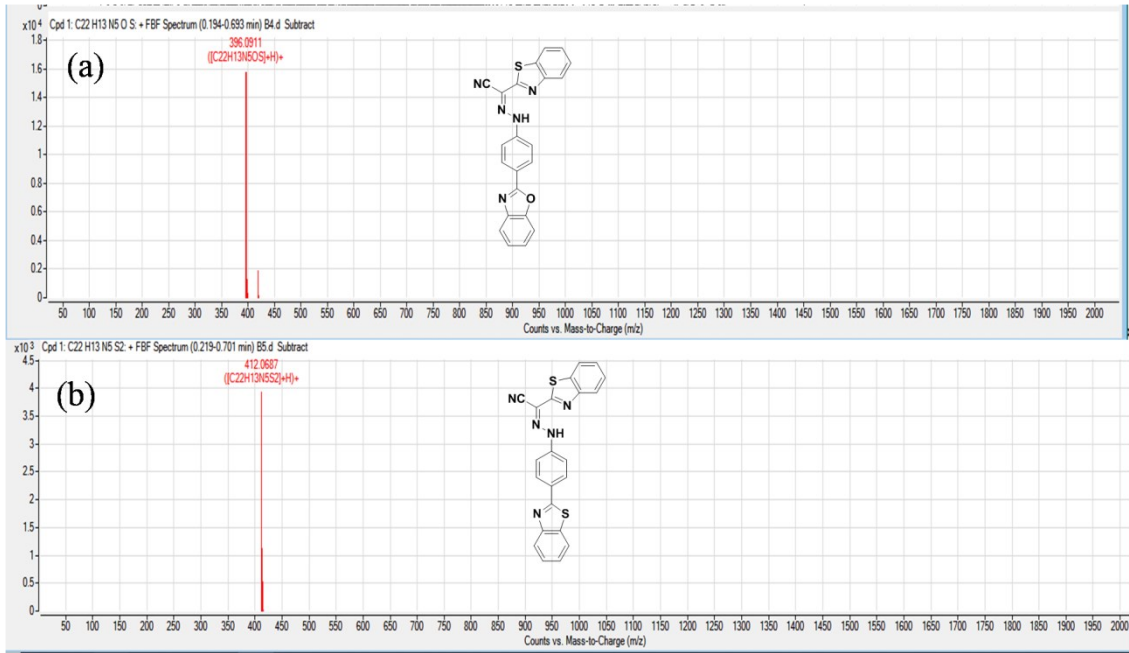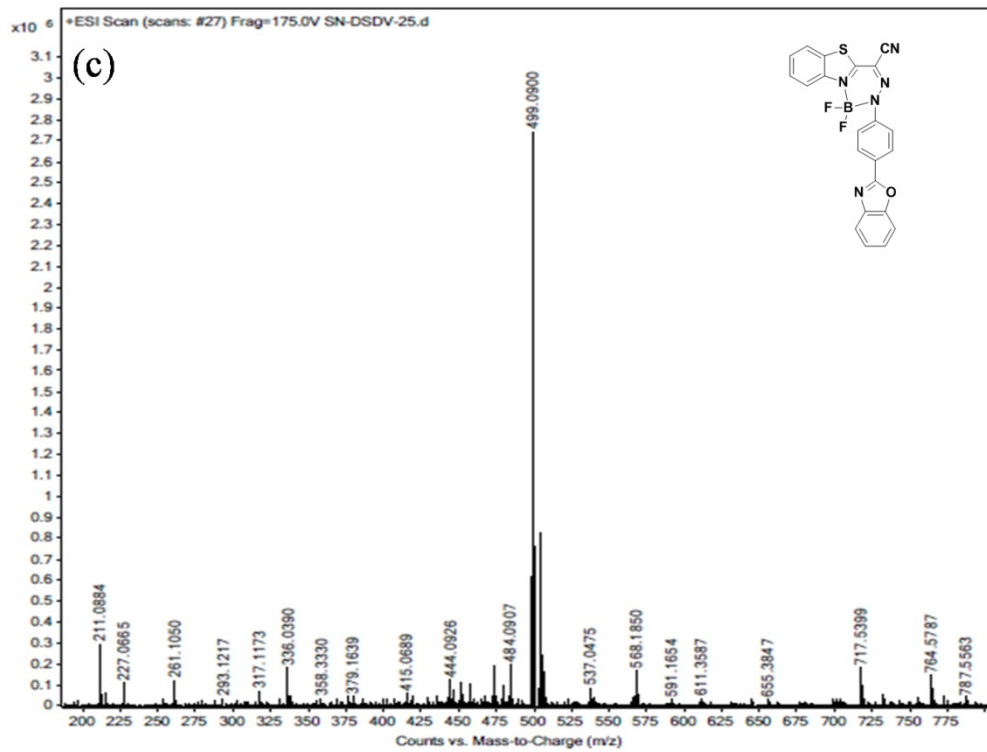

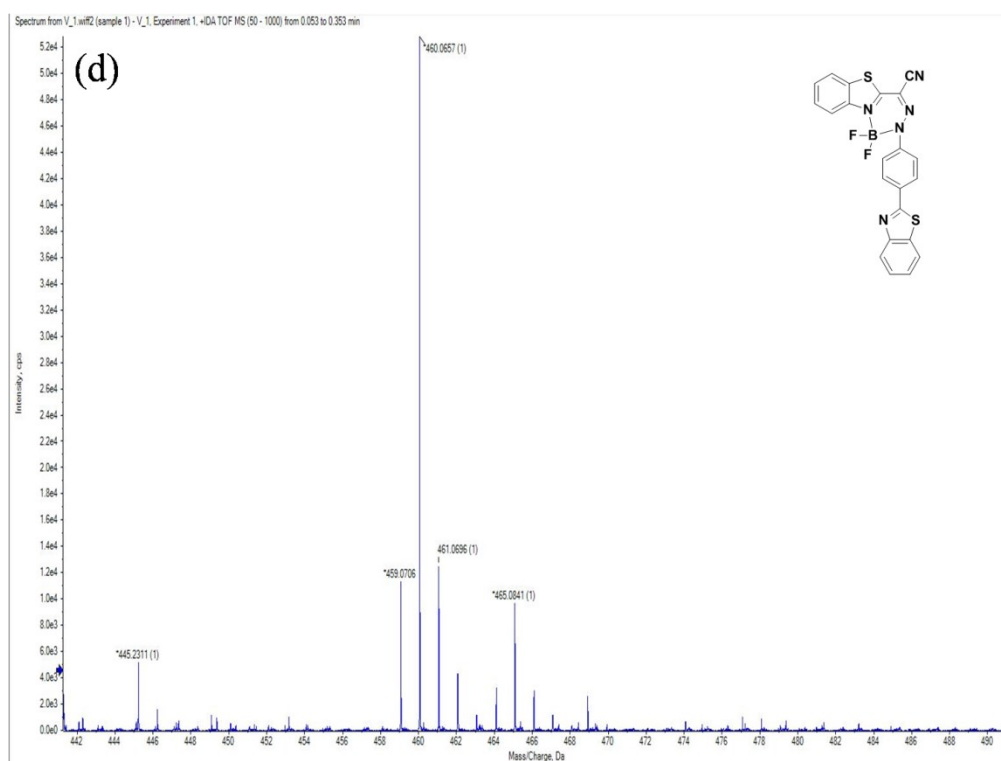

**Fig. S7.** Mass spectra of L1 (a), L2 (b), B1 (c) and B2 (d).

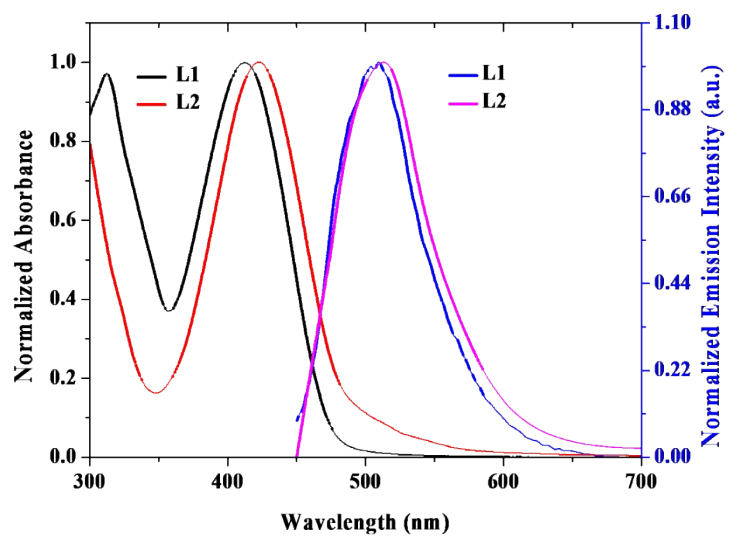

**Fig. S8.** Normalized UV-Visible (a) and normalized emission (b) spectra of L1 and L2 (c, 50  $\mu$ M).

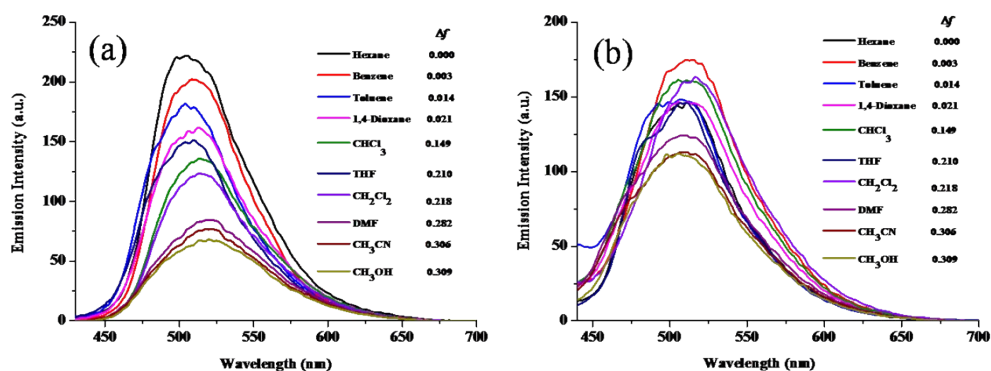

Fig. S9. Emission spectra of L1 (a) and L2 (b) in various solvent polarities (c, 50  $\mu$ M).

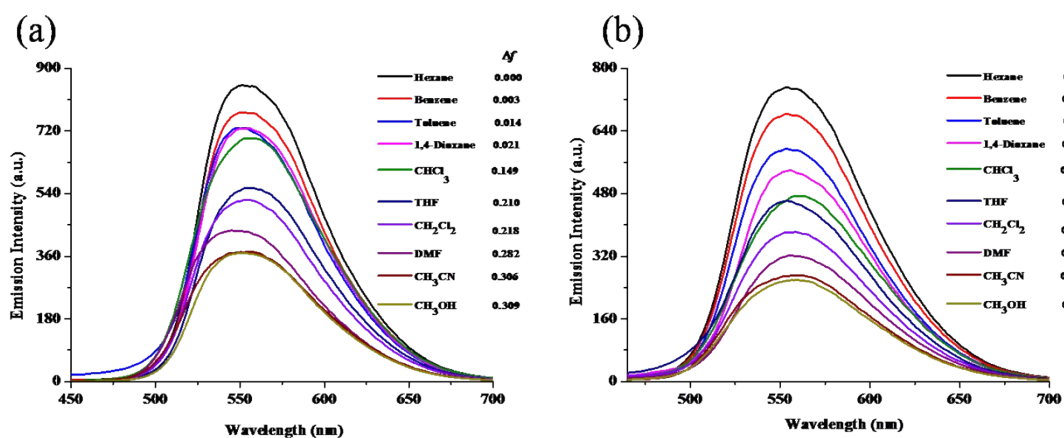

Fig. S10. Emission spectra of B1 (a) and B2 (b) in various solvent polarities (c, 50  $\mu$ M).

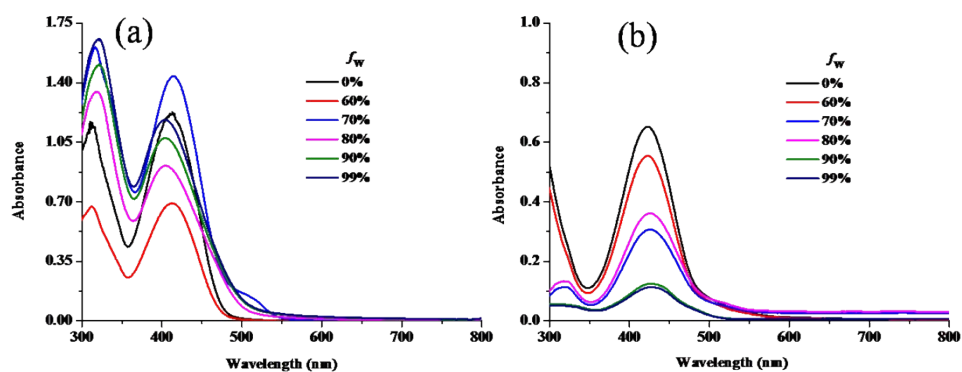

Fig. S11. Absorption spectra of L1 (a) and L2 (b) in THF/water fraction (c, 50  $\mu$ M).

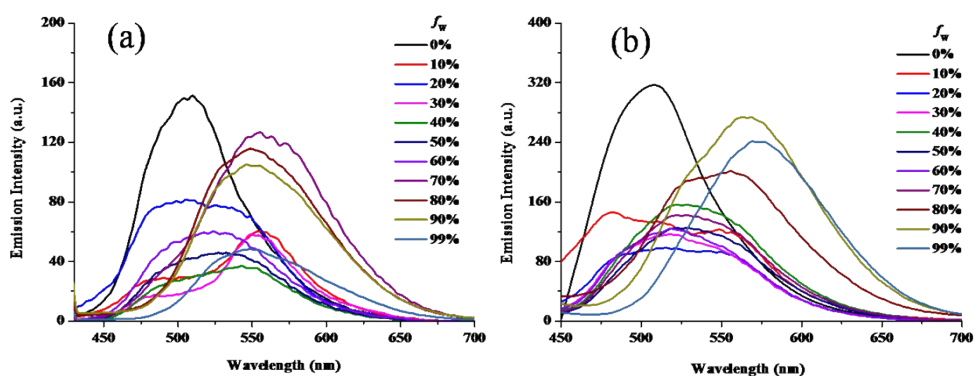

**Fig. S12.** Emission spectra of **L1** (a) and **L2** (b) in THF/water fraction (c, 50  $\mu$ M).

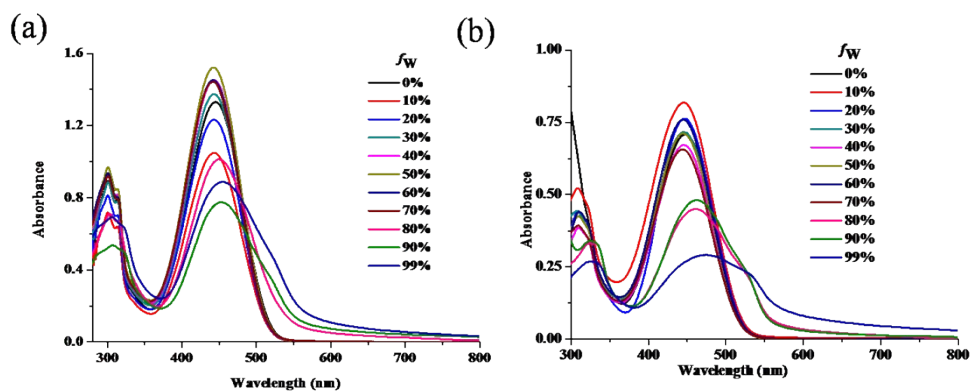

**Fig. S13.** Absorption spectra of **B1** (a) and **B2** (b) in THF/water fraction (c, 50  $\mu$ M).

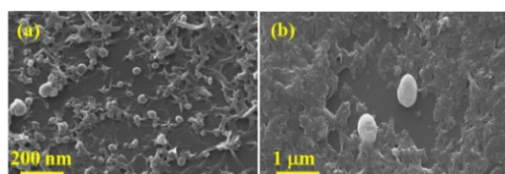

**Fig. S14.** SEM images of aggregates of **B1** (a) and **B2** (b) formed in mixture of THF/water (c, 50  $\mu$ M).

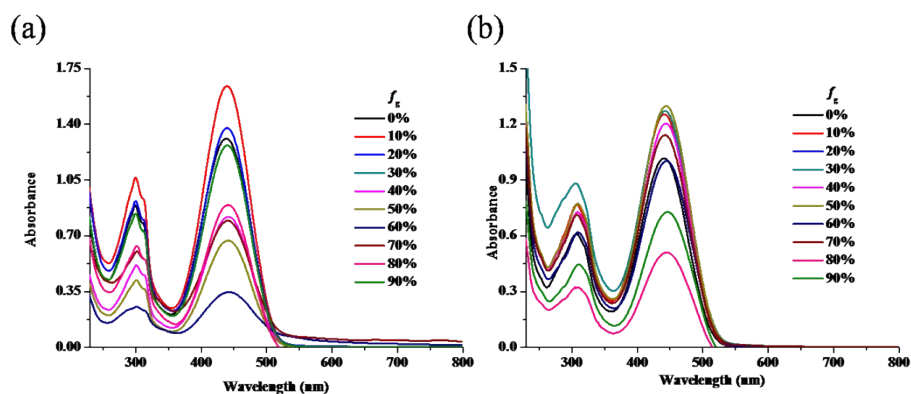

**Fig. S15.** Absorption spectra of **B1** (a) and **B2** (b) in CH<sub>3</sub>OH/glycerol fraction (c, 50 μM).

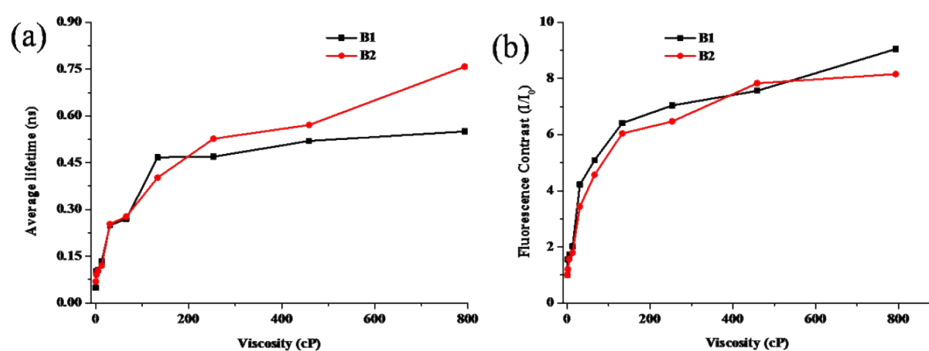

**Fig. S16.** (a) Average fluorescence lifetimes of **B1** and **B2** as function of viscosity; (b) Fluorescence contrast ( $I/I_0$ ) of **B1** and **B2** as function of viscosity.

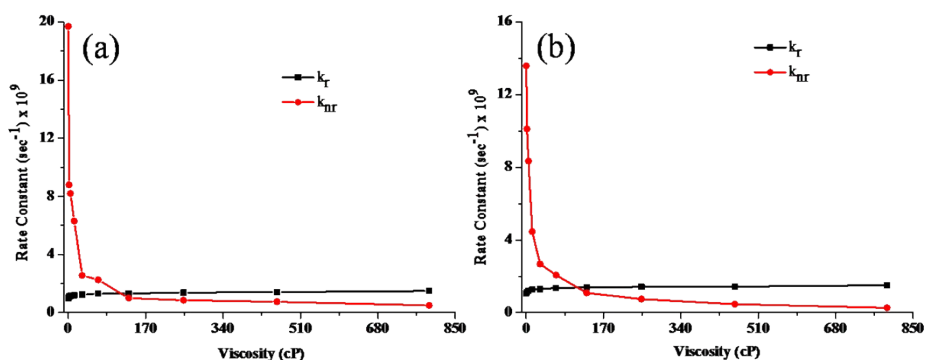

**Fig. S17.** Plot between radiative ( $k_r$ ) and non-radiative ( $k_{nr}$ ) rate constants vs. viscosity for **B1** (a) and **B2** (b).

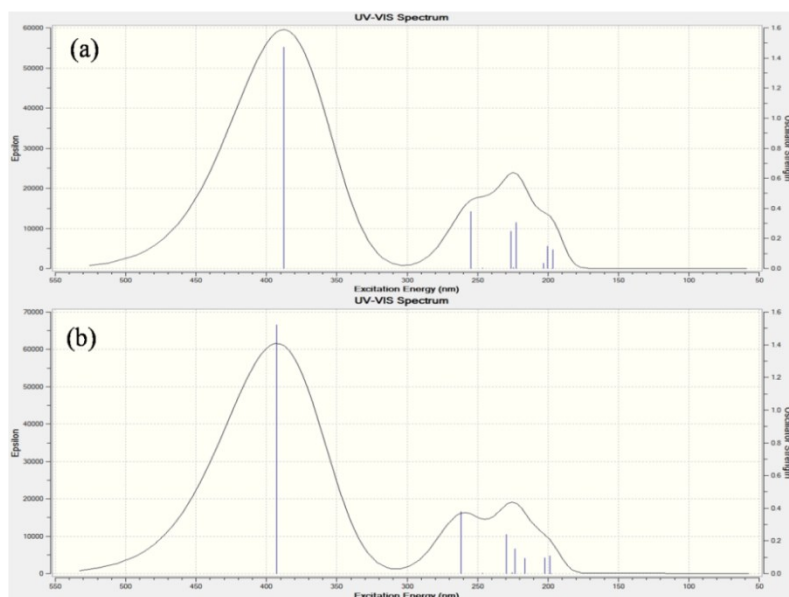

**Fig. S18.** UV-Vis spectra of **B1** (a) and **B2** (b) obtained from TD-DFT calculations.

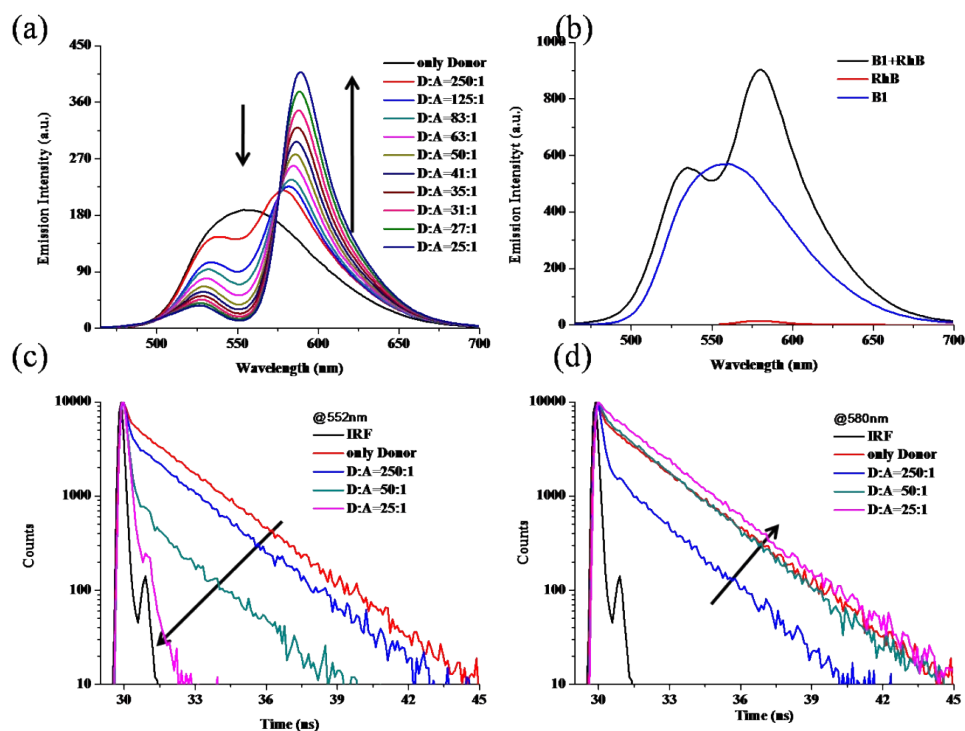

**Fig. S19.** (a) Fluorescence spectra of **B1** with gradual addition of RhB ( $\lambda_{\text{ex}} = 540 \text{ nm}$ ) in THF/water ( $f_w$  70%) ( $[\text{B1}] = 50 \mu\text{M}$  and  $[\text{RhB}] = 0.0, 0.2 \times 10^{-6}, 0.4 \times 10^{-6}, 0.6 \times 10^{-6}, 0.8 \times 10^{-6}, 1.0 \times 10^{-6}, 1.2 \times 10^{-6}, 1.4 \times 10^{-6}, 1.6 \times 10^{-6}, 1.8 \times 10^{-6}, 2.0 \times 10^{-6} \text{ M}$ ); (b) emission spectra of **B1** ( $50 \mu\text{M}$ ), RhB+**B1** ( $[\text{B1}] = 50 \mu\text{M}$ ,  $[\text{RhB}] = 1 \mu\text{M}$ ) and RhB ( $0.25 \mu\text{M}$ ); (c) and (d) Change in the fluorescence decay profiles of **B1** in the presence of RhB in THF/water (70%; v/v).

**Table S1. Experimental/theoretical absorption wavelength, energy, oscillation strength (*f*) and assignments**

|           | <b>Experimental Wavelength (nm)</b> | <b>Calculated Wavelength (nm)</b> | <b>Oscillator Strength (<i>f</i>)</b> | <b>Energy (eV)</b> | <b>% Contribution</b> | <b>Assignments</b>             |
|-----------|-------------------------------------|-----------------------------------|---------------------------------------|--------------------|-----------------------|--------------------------------|
| <b>B1</b> | 436                                 | 387                               | 1.455                                 | 3.20               | 16<br>72              | HOMO-1 → LUMO<br>HOMO → LUMO   |
|           |                                     | 255                               | 0.381                                 | 4.86               | 36<br>32              | HOMO-1 → LUMO<br>HOMO → LUMO+1 |
| <b>B2</b> | 440                                 | 393                               | 1.520                                 | 3.15               | 75<br>7               | HOMO → LUMO<br>HOMO-1 → LUMO   |
|           |                                     | 262                               | 0.380                                 | 4.73               | 42<br>18              | HOMO → LUMO+1<br>HOMO-2 → LUMO |
